# Supplementary material for: Setting Performance Indicators for Coastal Marine Protected Areas: An Expert-Based Methodology
Source: Frontiers journal article supplement (doi:10.3389/fmars.2022.848039), 2022-06-16
Supplement: Data_Sheet_1.PDF [file Data_Sheet_1.PDF]

# Setting performance indicators for coastal Marine Protected Areas (MPAs)

This is the workflow diagram of the expert-based process, especially designed for this paper.

**Overarching goal:** to define a manageable core list of MPA performance indicators, their survey methods and minimum monitoring frequencies.

**Main outputs:** (1) participants agreed on a core list of MPA performance indicators, (2) grouped indicators by priority level, (3) defined monitoring/reporting frequencies and survey methods.

## Legend:

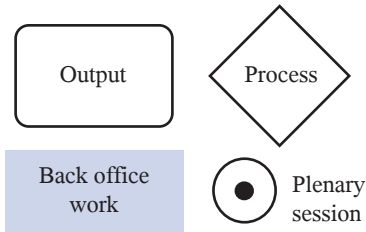

## Organizing Team

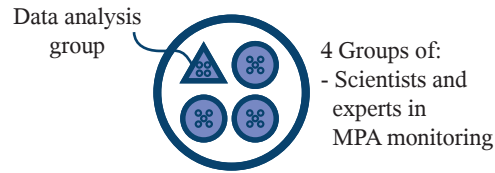

## Workshop participants

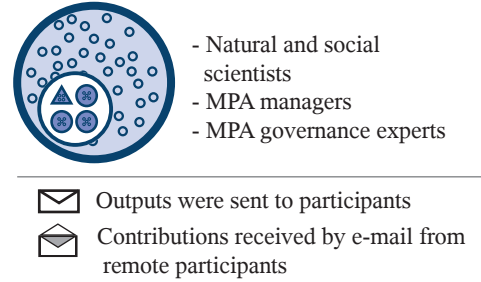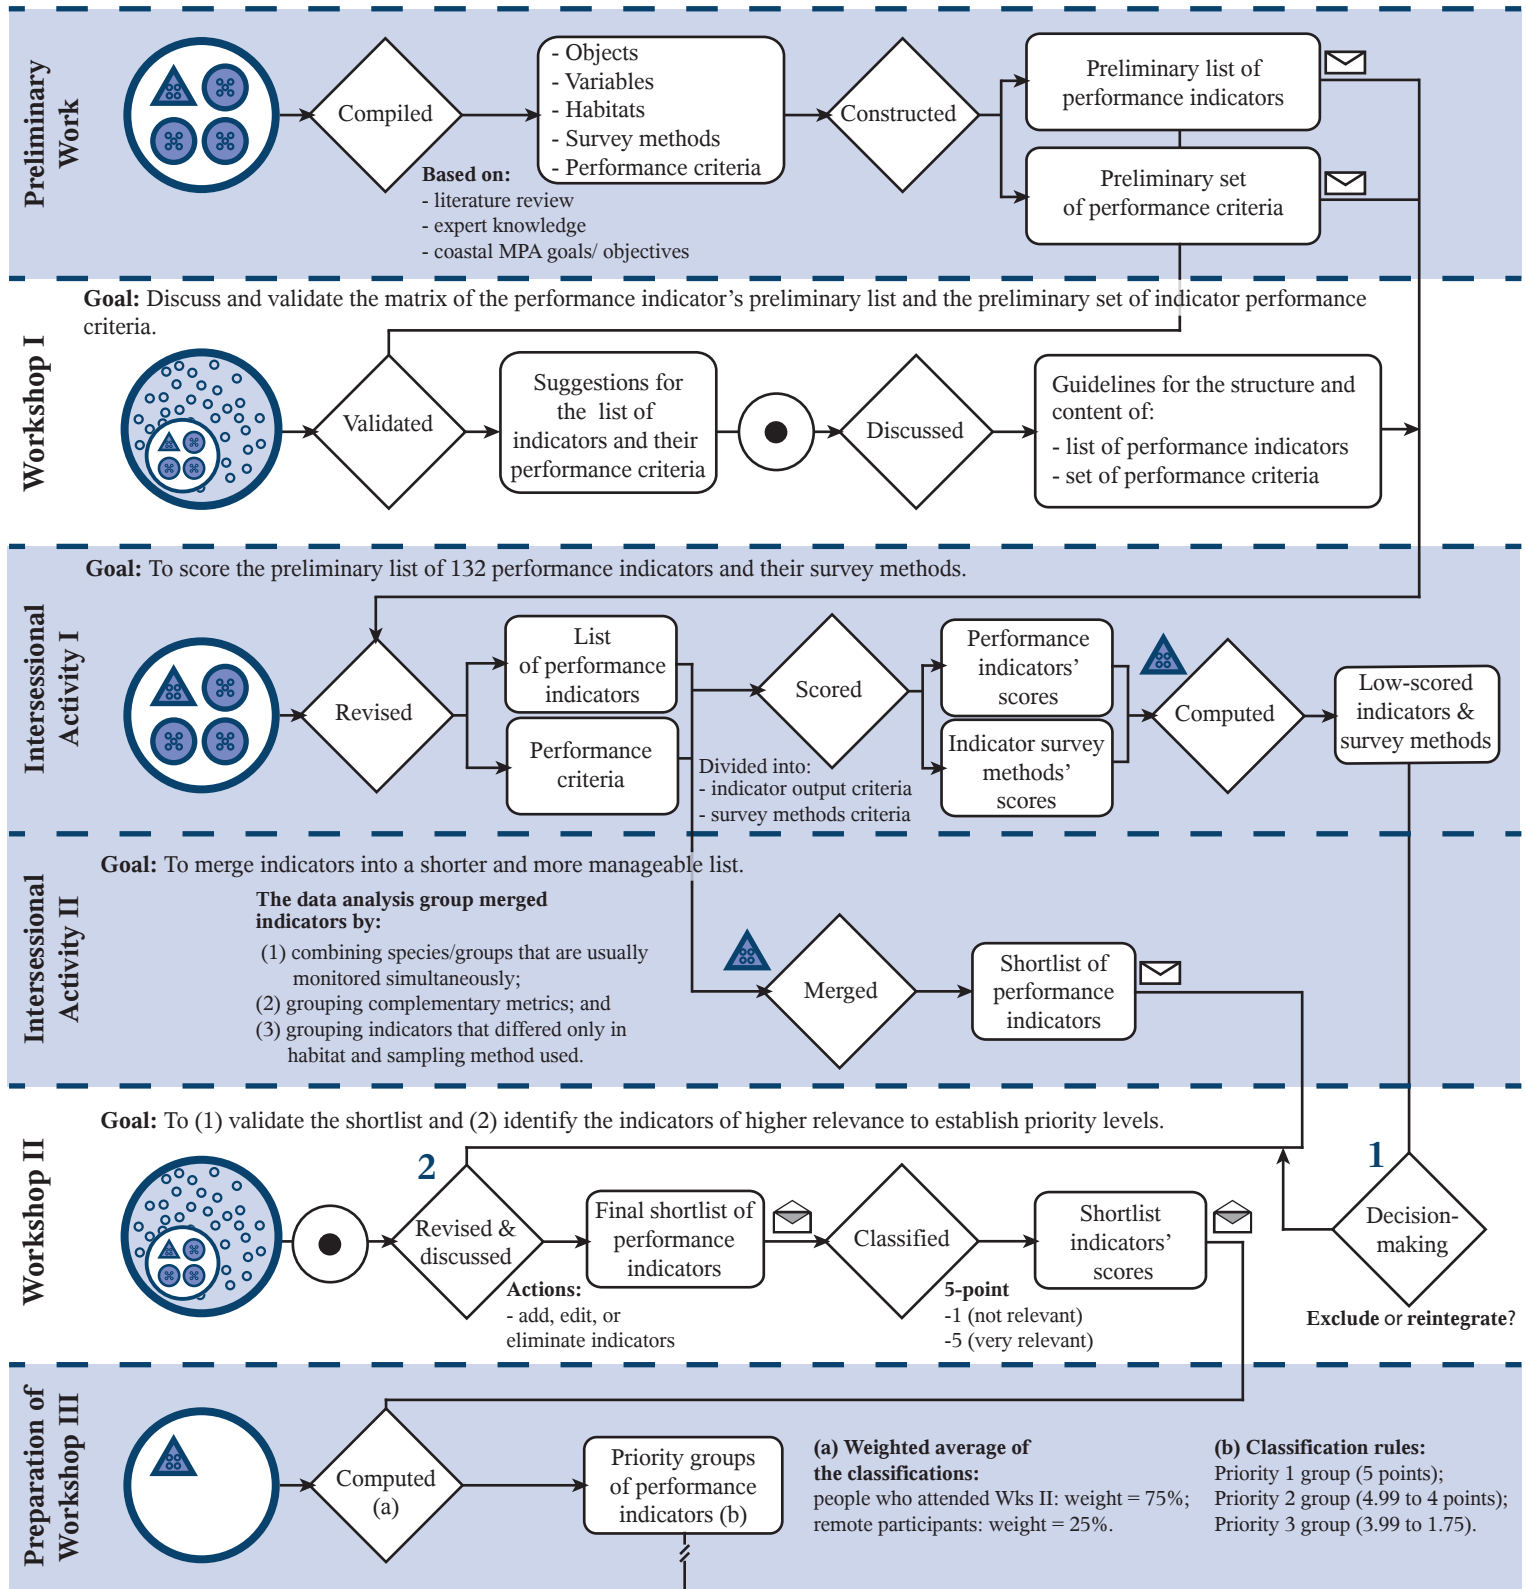

**Goal:** To: (1) validate the priority groups resulting from Workshop II; (2) define minimum monitoring frequencies for each prioritized indicator ; and (3) review the adequacy of survey methodologies previously considered for the indicators by matching indicators' minimum monitoring frequencies with the survey methods' possible implementation frequencies (using the existing resources).

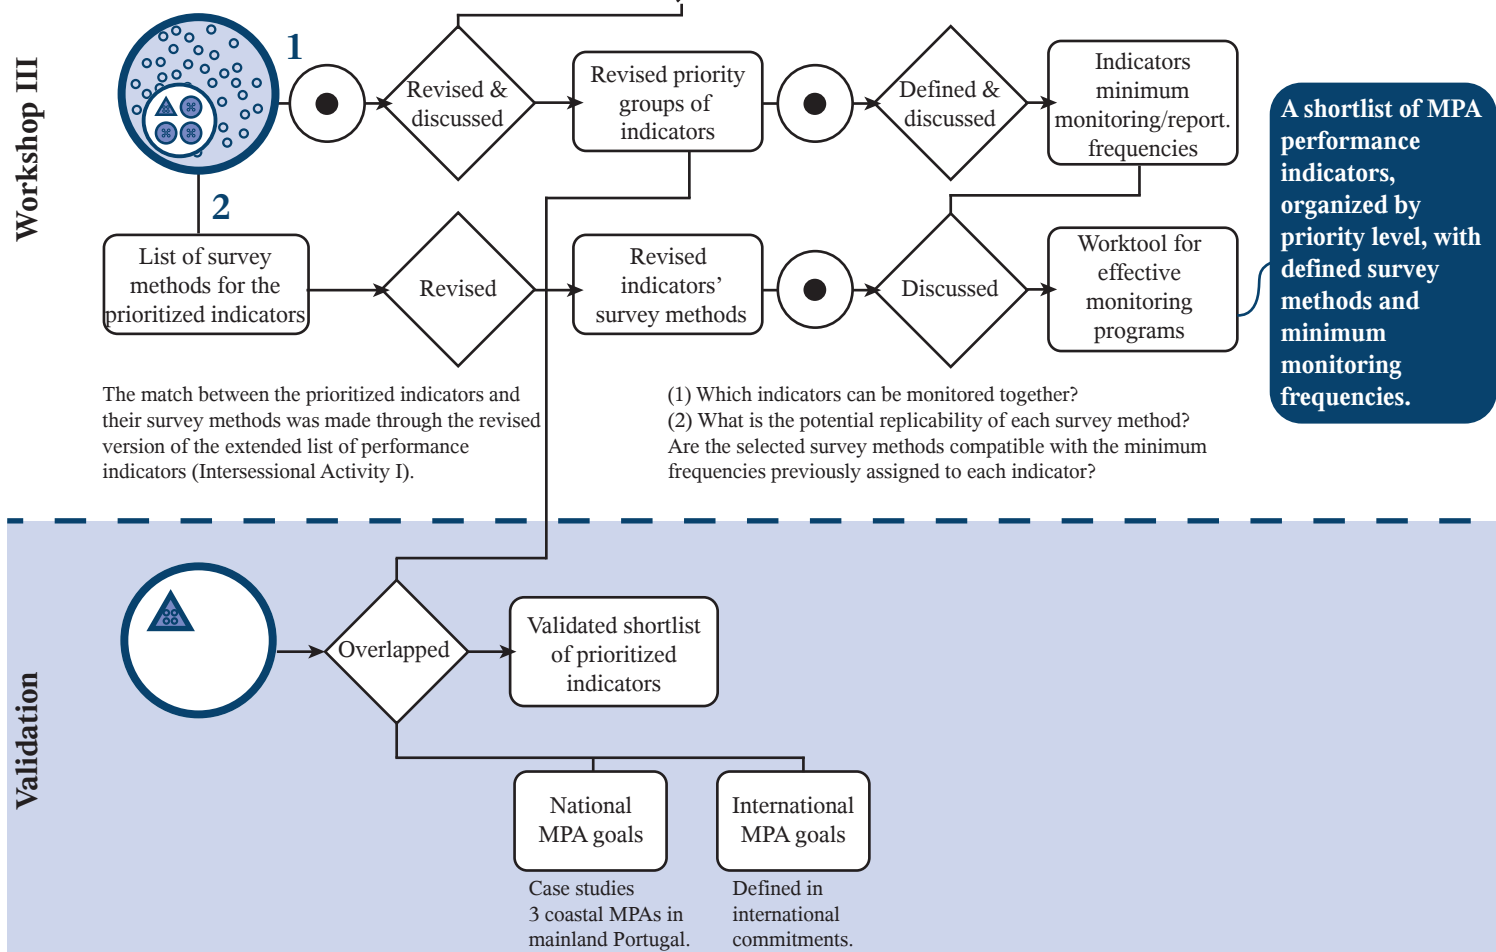

**Supplementary Figure 1.** Workflow diagram of the expert-based process.
