# Supplementary material for: Setting Performance Indicators for Coastal Marine Protected Areas: An Expert-Based Methodology
Source: Frontiers journal article supplement (doi:10.3389/fmars.2022.848039), 2022-06-16
Supplement: Table_1.XLSX [file Table_1.XLSX]

## Sheet: Sheet1
ID	Indicator theme	Goal	Variable	Object	Target	Indicator	Metrics	Indicator's complexity	Habitat	Survey method	Natura 2000 Network	MSFD (descriptors)	OSPAR
1	Environmental	Conserve the integrity of habitats that support biotic communities	Distribution	habitat	soft substrata (habitat 1110)	Extension And Distribution of Sandbanks (Habitat 1110)	area unit (m2); distribution: 0/ 1 (georreferenced using GNSS RTK, GPS system)	simple	infralittoral sand	Multibeam/sonar scanning	1	1	1
2	Environmental	Conserve the integrity of habitats that support biotic communities	Distribution	habitat	hard substrata (rock or biogenic; habitat 1170)	Extension And Distribution of Reefs (Habitat 1170)	area unit (m2); distribution: 0/ 1 (georreferenced using GNSS RTK, GPS system)	simple	infralittoral rock	Multibeam/sonar scanning; ROV (image analysis)	1	1	1
3	Environmental	Conserve the integrity of habitats that support biotic communities	Index	habitat	hard substrata (rock or biogenic)	Rugosity index of hard substrata (Habitat Complexity) (Habitat 1170)	Ar/Ag (where Ar is the real surface area and Ag is the geometric surface area)	simple	infralittoral rock	Multibeam/sonar scanning	1	1	1
4	Environmental	Conserve the integrity of habitats that support biotic communities	Distribution	habitat	caves (habitat 8830)	Distribution of Caves (Habitat 8830)	N; distribution: 0/ 1 (georreferenced using GNSS RTK, GPS system)	simple	infralittoral rock	Visual censuses (boat transects, collaboration with Diving centers)	1	1	1
5	Environmental	Restore and conserve marine biodiversity and communities' composition	Species Richness/ Diversity	fish	communities or key species (protected, commercial, non-commercial, trophic groups, functional groups) (habitat 1170)	Species Richnesss/ Diversity of Fish (Margalef; Simpson; Shannon; Eveness; Alfa; Beta; Gamma; Pielou Indices)	N/ Nmax frame; index	simple/ composite	infralittoral rock	Baited cameras (BRUVs)	1	1	1
6	Environmental	Restore and conserve marine biodiversity and communities' composition	Species Richness/ Diversity	endofauna	key species (protected, trophic groups, functional groups) (habitat 1110)	Species Richnesss/ Diversity of Endofauna (Margalef; Simpson; Shannon; Eveness; Alfa; Beta; Gamma; Pielou Indices)	N/ area unit (m2); index	simple/ composite	infralittoral sand	Dredges	1	1	0
7	Environmental	Restore and conserve marine biodiversity and communities' composition	Species Richness/ Diversity	fish and invertebrates	communities or key species (commercial, non-commercial, trophic groups, functional groups) (habitat 1110)	Species Richnesss/ Diversity of Fish and Invertebrates (Margalef; Simpson; Shannon; Eveness; Alfa; Beta; Gamma; Pielou Indices)	N; index	simple/ composite	infralittoral sand	Experimental fishing (beam trawling)	0	1	1
8	Environmental	Restore and conserve marine biodiversity and communities' composition	Species Richness/ Diversity	fish and invertebrates	communities or key species (commercial, non-commercial, trophic groups, functional groups) (habitats 1170, 1110)	Species Richnesss/ Diversity of Fish and Invertebrates (Margalef; Simpson; Shannon; Eveness; Alfa; Beta; Gamma; Pielou Indices)	N/ effort unit; index	simple/ composite	infralittoral rock/ sand	Experimental fishing (trammel net, longline, traps)	0	1	1
9	Environmental	Restore and conserve marine biodiversity and communities' composition	Species Richness/ Diversity	fish and invertebrates	communities or key species (protected, commercial, non-commercial, trophic groups, functional groups ) (habitat 1170)	Species Richnesss/ Diversity of Fish and Invertebrates (Margalef; Simpson; Shannon; Eveness; Alfa; Beta; Gamma; Pielou Indices)	N/ effort unit; index	simple/ composite	infralittoral rock	ROV (image analysis)	1	1	1
10	Environmental	Restore and conserve marine biodiversity and communities' composition	Species Richness/ Diversity	invertebrates and algae	key species (commercial, protected, engineering)	Species Richnesss/ Diversity of Invertebrates and Algae (Margalef; Simpson; Shannon; Eveness; Alfa; Beta; Gamma; Pielou Indices)	N; index	simple/ composite	intertidal rock	Intertidal visual censuses (e.g., transects and quadrats)	1	1	1
11	Environmental	Restore and conserve marine biodiversity and communities' composition	Species Richness/ Diversity	fish, invertebrates and algae	communities or key species (protected, commercial, non-commercial, engineering, trophic groups, functional groups) (habitat 1170)	Species Richnesss/ Diversity of Fish, Invertebrates and Algae (Margalef; Simpson; Shannon; Eveness; Alfa; Beta; Gamma; Pielou Indices)	N/ effort unit; N/ area unit (m2); index	simple/ composite	infralittoral rock	UVC (e.g., transects and quadrats)	1	1	1
12	Environmental	Restore and conserve marine biodiversity and communities' composition	Species Richness/ Diversity	fish and invertebrates	communities or key species (protected, commercial, non-commercial, trophic groups, functional groups); caves (habitat 8830)	Species Richnesss/ Diversity of Fish and Invertebrates (Margalef; Simpson; Shannon; Eveness; Alfa; Beta; Gamma; Pielou Indices)	N/ effort unit; N/ area unit (m2); index	simple/ composite	infralittoral rock	UVC (e.g., transects and quadrats)	1	1	1
13	Environmental	Restore and conserve marine biodiversity and communities' composition	Species Richness	marine birds	protected species	Species Richness of Marine Birds	N/ effort unit (transect)	simple	water surface/ coast	Visual censuses (from the coast, boat transects and photo-identification)	1	1	1
14	Environmental	Restore and conserve marine biodiversity and communities' composition	Species Richness	marine turtles and mammals	protected species	Species Richness of Marine Turtles and Mammals	N/ effort unit (transect)	simple	water surface	Visual censuses (boat transects and photo-identification)	1	1	1
15	Environmental	Restore and conserve marine biodiversity and communities' composition	Presence/ Absense	fish and invertebrates	key species (protected, non-indigenous, protected)	Presence/ Absense of Fish and Invertebrates	0/1	simple	infralittoral sand	Experimental fishing (beam trawling)	0	1	1
16	Environmental	Restore and conserve marine biodiversity and communities' composition	Presence/ Absense	fish and invertebrates	key species (protected, non-indigenous, protected)	Presence/ Absense of Fish and Invertebrates	0/1	simple	infralittoral rock/ sand	Experimental fishing (trammel net, longline, traps)	0	1	1
17	Environmental	Restore and conserve marine biodiversity and communities' composition	Presence/ Absense	fish and invertebrates	key species (protected, non-indigenous, protected)	Presence/ Absense of Fish and Invertebrates	0/1	simple	infralittoral rock/ sand	ROV (image analysis)	0	1	1
18	Environmental	Restore and conserve marine biodiversity and communities' composition	Presence/ Absense	fish and invertebrates	key habitats (protected, non-indigenous, protected)	Presence/ Absense of Fish and Invertebrates	0/1	simple	infralittoral rock/ sand	ROV (image analysis)	0	1	1
19	Environmental	Restore and conserve marine biodiversity and communities' composition	Presence/ Absense	fish and invertebrates	key species (protected, non-indigenous, protected)	Presence/ Absense of Fish and Invertebrates	0/1	simple	infralittoral rock	UVC (e.g., transects and quadrats)	0	1	1
20	Environmental	Restore and conserve marine biodiversity and communities' composition	Presence/ Absense	invertebrates and algae	key species (protected, non-indigenous, protected)	Presence/ Absense of Invertebrates and Algae	0/1	simple	intertidal rock	Intertidal visual censuses (e.g., transects and quadrats)	0	1	1
21	Environmental	Restore and conserve the distribution, abundance and structure of marine communities	Density	endofauna	key species (protected, trophic groups, functional groups)	Density of Endofauna	N/ area unit (m2)	simple	infralittoral sand	Dredges	1	1	0
22	Environmental	Restore and conserve the distribution, abundance and structure of marine communities	Density	marine birds	protected species	Density/ Reproductive Pairs Density of Marine Birds	N/ effort unit (transect)	simple	water surface/ coast	Visual censuses (from the coast, boat transects and photo-identification)	1	1	1
23	Environmental	Restore and conserve the distribution, abundance and structure of marine communities	Density	fish and invertebrates	commercial species	Density of Commercial Fish and Invertebrates	N/ effort unit	simple	infralittoral rock/ sand	Analysis of fish auction discharges	0	1	0
24	Environmental	Restore and conserve the distribution, abundance and structure of marine communities	Density	fish	commercial species	Density of Commercial Fish	N/ effort unit	simple	pelagic	Experimental fishing (pelagic trawling)	0	1	0
25	Environmental	Restore and conserve the distribution, abundance and structure of marine communities	Density	fish and invertebrates	communities or key species (commercial, non-commercial, trophic groups, functional groups)	Density of Fish and Invertebrates	N/ area unit (m2)	simple	infralittoral sand	Experimental fishing (beam trawling)	0	1	1
26	Environmental	Restore and conserve the distribution, abundance and structure of marine communities	Density	fish and invertebrates	communities or key species (commercial, non-commercial, trophic groups, functional groups)	Density of Fish and Invertebrates	N/ effort unit	simple	infralittoral rock/ sand	Experimental fishing (trammel net, longline, traps)	0	1	0
27	Environmental	Restore and conserve the distribution, abundance and structure of marine communities	Density	fish and invertebrates	communities or key species (protected, commercial, non-commercial, trophic groups, functional groups); in crevices (habitat 1170)	Density of Fish and Invertebrates in Crevices (Habitat 1170)	N/ area unit (m2)	simple	infralittoral rock: in crevices (habitat 1170)	UVC (e.g., transects and quadrats)	1	1	1
28	Environmental	Restore and conserve the distribution, abundance and structure of marine communities	Density	fish	commercial species	Density of Commercial Fish	N/ volume unit (m3)	simple	pelagic	Acoustic sampling with multibeam/sonar scanning (pelagic species)	0	1	0
29	Environmental	Restore and conserve the distribution, abundance and structure of marine communities	Density	fish	communities or key species (protected, commercial, non-commercial, trophic groups, functional groups)	Density of Fish	N/ area unit (m2) (frame Nmax)	simple	infralittoral rock	Baited cameras (BRUVs)	1	1	1
30	Environmental	Restore and conserve the distribution, abundance and structure of marine communities	Density	fish and invertebrates	communities or key species (protected, commercial, non-commercial, trophic groups, functional groups)	Density of Fish and Invertebrates	N/ effort unit	simple	infralittoral rock/ sand	ROV (image analysis)	1	1	1
31	Environmental	Restore and conserve the distribution, abundance and structure of marine communities	Density	invertebrates	key species (commercial, protected)	Density of Invertebrates	N/ area unit (m2)	simple	intertidal rock	Intertidal visual censuses (e.g., transects and quadrats)	1	1	1
32	Environmental	Restore and conserve the distribution, abundance and structure of marine communities	Density	fish, invertebrates and algae	communities or key species (protected, commercial, non-commercial, engineering, trophic groups, functional groups)	Density of Fish, Invertebrates and Algae	N/ area unit (m2)	simple	infralittoral rock	UVC (e.g., transects and quadrats)	1	1	1
33	Environmental	Restore and conserve the distribution, abundance and structure of marine communities	Density	marine turtles and mammals	protected species	Density of Marine Turtles and Mammals	N/ area unit (m2)	simple	water surface	Visual censuses (boat transects and photo-identification)	1	1	1
34	Environmental	Restore and conserve the distribution, abundance and structure of marine communities	Density	seagrass	marine prairies	Density of Seagrass Stems (Habitat 1110)	N/ area unit (m2)	simple	infralittoral sand	UVC (e.g., transects and quadrats)	1	1	1
35	Environmental	Restore and conserve the distribution, abundance and structure of marine communities	Frequency of Occurrence	fish and invertebrates	communities or key species (commercial, non-commercial, trophic groups, functional groups)	Frequency of Occurrence of Fish and Invertebrates	N/ effort unit	simple	infralittoral sand	Experimental fishing (beam trawling)	0	1	0
36	Environmental	Restore and conserve the distribution, abundance and structure of marine communities	Frequency of Occurrence	fish and invertebrates	communities or key species (commercial, non-commercial, trophic groups, functional groups) (habitats 1170, 1110)	Frequency of Occurrence of Fish and Invertebrates	N/ effort unit; index	simple	infralittoral rock/ sand	Experimental fishing (trammel net, longline, traps)	0	1	0
37	Environmental	Restore and conserve the distribution, abundance and structure of marine communities	Frequency of Occurrence	fish and invertebrates	communities or key species (protected, commercial, non-commercial, trophic groups, functional groups (habitat 1170)	Frequency of Occurrence of Fish and Invertebrates	N/ effort unit; index	simple	infralittoral rock	ROV (image analysis)	1	1	1
38	Environmental	Restore and conserve the distribution, abundance and structure of marine communities	Relative Abundance	marine turtles and mammals, fish and invertebrates	communities	By-Catch Patterns of Fish and Invertebrates	N/ effort unit	simple	all	By-catch analysis	0	1	1
39	Environmental	Restore and conserve the distribution, abundance and structure of marine communities	Relative Abundance	fish, invertebrates and algae	non-indigenous species	Percentage of non-indigenous Species (Fish, Invertebrates, Algae)	%	simple	infralittoral rock	UVC (e.g., transects and quadrats)	0	1	1
40	Environmental	Restore and conserve the distribution, abundance and structure of marine communities	Percent Cover (Relative Abundance)	invertebrates and algae	key species (non-commercial, protected, engineering, functional groups)	Percent Cover of Invertebrates and Algae	%	simple	intertidal rock	Intertidal visual censuses (e.g., transects and quadrats)	1	1	1
41	Environmental	Restore and conserve the distribution, abundance and structure of marine communities	Biomass	endofauna	key species (protected, trophic groups, functional groups)	Biomass of Endofauna	g/ area unit (m2)	simple	infralittoral sand	Dredges	1	1	0
42	Environmental	Restore and conserve the distribution, abundance and structure of marine communities	Biomass	fish	commercial species	Biomass of Commercial Fish	g/ effort unit	simple	pelagic	Experimental fishing (pelagic trawling)	0	1	0
43	Environmental	Restore and conserve the distribution, abundance and structure of marine communities	Biomass	fish	key species (protected, commercial, non-commercial, trophic groups, functional groups)	Biomass of Fish	g/ m2 (frame Nmax)	simple	infralittoral rock	Baited cameras (BRUVs)	1	1	1
44	Environmental	Restore and conserve the distribution, abundance and structure of marine communities	Biomass	fish and invertebrates	communities or key species (commercial, non-commercial, trophic groups, functional groups)	Biomass of Fish and Invertebrates	g/ area unit (m2)	simple	infralittoral sand	Experimental fishing (beam trawling)	0	1	1
45	Environmental	Restore and conserve the distribution, abundance and structure of marine communities	Biomass	invertebrates and algae	key species (commercial, protected, engineering)	Biomass of Invertebrates and Algae	g/ area unit (m2)	simple	infralittoral rock	Intertidal visual censuses (e.g., transects and quadrats)	1	1	1
46	Environmental	Restore and conserve the distribution, abundance and structure of marine communities	Biomass	fish, invertebrates and algae	key species (protected, commercial, non-commercial, engineering, trophic groups, functional groups)	Biomass of Fish, Invertebrates and Algae	g/ area unit (m2)	simple	infralittoral rock	UVC (e.g., transects and quadrats)	1	1	1
47	Environmental	Restore and conserve the distribution, abundance and structure of marine communities	Biomass	fish and invertebrates	communities or key species (commercial, non-commercial, trophic groups, functional groups); in crevices (habitat 1170)	Biomass of Fish and Invertebrates in Crevices (Habitat 1170)	g/ effort unit; g/ area unit (m2)	simple	infralittoral rock: in crevices (habitat 1170)	UVC (e.g., transects and quadrats)	1	1	1
48	Environmental	Restore and conserve the distribution, abundance and structure of marine communities	Biomass	fish and invertebrates	commercial species	Biomass of Commercial Fish and Invertebrates	g/ effort unit	simple	infralittoral rock/ sand	Analysis of fish auction discharges	0	1	0
49	Environmental	Restore and conserve the distribution, abundance and structure of marine communities	Biomass	fish and invertebrates	key species (commercial, non-commercial, trophic groups, functional groups)	Biomass of Fish and Invertebrates	g/ effort unit	simple	infralittoral rock/ sand	Experimental fishing (trammel net, longline, traps)	0	1	1
50	Environmental	Restore and conserve the distribution, abundance and structure of marine communities	Distribution	seagrass	marine prairies	Evolution of the Extension, Distribution And Limits of Marine Prairies	m2; distribution: 0/ 1 (georreferenced using GNSS RTK, GPS system)	simple	infralittoral sand	Remote sensing (orthophotos)	1	1	1
51	Environmental	Restore and conserve the distribution, abundance and structure of marine communities	Distribution	seagrass	marine prairies	Evolution of the Extension, Distribution And Limits of Marine Prairies	m2; distribution: 0/ 1 (georreferenced using GNSS RTK, GPS system)	simple	infralittoral sand	UVC (e.g., transects and quadrats)	1	1	1
52	Environmental	Restore and conserve the distribution, abundance and structure of marine communities	Area	seagrass	marine prairies	Extension of Marine Prairies	area unit (m2)	simple	infralittoral sand	UVC (e.g., transects and quadrats)	1	1	1
53	Environmental	Restore and conserve the distribution, abundance and structure of marine communities	Percent Cover (Relative Abundance)	seagrass	marine prairies	Percent Cover of Marine Prairies	%	simple	infralittoral sand	UVC (e.g., transects and quadrats)	1	1	1
54	Environmental	Restore and conserve the distribution, abundance and structure of marine communities	Distribution	fish and invertebrates	communities or key species (protected, commercial, non-commercial, trophic groups, functional groups); in crevices (habitat 1170)	Distribution of Fish and Invertebrates in Crevices (Habitat 1170)	N/ effort unit	simple	infralittoral rock: in crevices (habitat 1170)	UVC (transects)	1	1	1
55	Environmental	Restore and conserve the distribution, abundance and structure of marine communities	Distribution	fish	commercial species	Distribution of Fish Commercial Species	N/ volume unit (m3)	simple	pelagic	Acoustic sampling with multibeam/sonar scanning (pelagic species)	0	1	0
56	Environmental	Restore and conserve the distribution, abundance and structure of marine communities	Distribution	marine turtles and mammals	protected species	Distribution Patterns of Marine Turtles and Mammals Populations	N; distribution: 0/ 1 (georreferenced using GNSS RTK, GPS system)	simple	water surface	Visual censuses (boat transects and photo-identification)	1	1	1
57	Environmental	Restore and conserve the distribution, abundance and structure of marine communities	Distribution	fish, invertebrates and algae	non-indigenous species	Distribution of non-indigenous Species (Fish, Invertebrates and Algae)	N; distribution: 0/ 1 (georreferenced using GNSS RTK, GPS system)	simple	infralittoral rock	UVC (e.g., transects and quadrats)	0	1	1
58	Environmental	Restore and conserve the distribution, abundance and structure of marine communities	Frequency of Occurrence	endofauna	key species (protected, trophic groups, functional groups)	Frequency of Occurrence of Endofauna	%	simple	infralittoral sand	Dredges	1	1	0
59	Environmental	Restore and conserve the distribution, abundance and structure of marine communities	Frequency of Occurrence	fish, invertebrates and algae	communities or key species (protected, commercial, non-commercial, engineering, trophic groups, functional groups)	Frequency of Occurrence of Fish, Invertebrates and Algae	N/ transecto; N/ area unit (m2)	simple	infralittoral rock	UVC (e.g., transects and quadrats)	1	1	1
60	Environmental	Restore and conserve the distribution, abundance and structure of marine communities	Frequency of Occurrence	fish	communities key species (protected, commercial, non-commercial, trophic groups, functional groups) (habitat 1170)	Frequency of Occurrence of Fish	N/ (frame Nmax)	simple	infralittoral rock	Baited cameras (BRUVs)	1	1	1
61	Environmental	Restore and conserve the distribution, abundance and structure of marine communities	Frequency of Occurrence	fish	commercial species	Frequency of Occurrence of Commercial Fish	N/ effort unit	simple	pelagic	Experimental fishing (pelagic trawling)	0	1	0
62	Environmental	Restore and conserve the distribution, abundance and structure of marine communities	Frequency of Occurrence	fish and invertebrates	commercial species	Frequency of Occurrence of Commercial Fish and Invertebrates	N/ effort unit	simple	infralittoral rock/ sand	Analysis of fish auction discharges	0	1	0
63	Environmental	Restore and conserve marine communities' size structure	Average size	corals and sponges	key species (engineering, commercial, non-commercial, functional groups)	Average Size of Corals and Sponges	X cm (+- EP)	simple	infralittoral rock	ROV (image analysis)	1	1	1
64	Environmental	Restore and conserve marine communities' size structure	Average size	fish	key species (protected, commercial, non-commercial, trophic groups, functional groups)	Average Size of Fish	X cm (+- EP)	simple	infralittoral rock	Baited cameras (BRUVs)	1	1	1
65	Environmental	Restore and conserve marine communities' size structure	Average size	fish	commercial species	Average Size of Commercial Fish	X cm (+- EP)	simple	pelagic	Experimental fishing (pelagic trawling)	0	1	0
66	Environmental	Restore and conserve marine communities' size structure	Average size	fish and invertebrates	communities or key species (commercial, non-commercial, trophic groups, functional groups)	Average Size of Fish and Invertebrates	X cm (+- EP)	simple	infralittoral sand	Experimental fishing (beam trawling)	0	1	1
67	Environmental	Restore and conserve marine communities' size structure	Average size	fish and invertebrates	key species (commercial, non-commercial, trophic groups, functional groups)	Average Size of Fish and Invertebrates	X cm (+- EP)	simple	infralittoral rock/ sand	Experimental fishing (trammel net, longline, traps)	0	1	1
68	Environmental	Restore and conserve marine communities' size structure	Average size	fish and invertebrates	key species (protected, commercial, non-commercial, trophic groups, functional groups)	Average Size of Fish and Invertebrates	X cm (+- EP)	simple	infralittoral rock	UVC (e.g., transects and quadrats)	1	1	1
69	Environmental	Restore and conserve marine communities' size structure	Average size	fish and invertebrates	key species (protected, commercial, non-commercial, trophic groups, functional groups); in crevices (habitat 1170)	Average Size of Fish and Invertebrates	X cm (+- EP)	simple	infralittoral rock: in crevices (habitat 1170)	UVC (transects)	1	1	1
70	Environmental	Restore and conserve marine communities' size structure	Average size	fish, invertebrates and algae	key species (protected, commercial, non-commercial, engineering, trophic groups, functional groups)	Average Size of Fish, Invertebrates and Algae	X cm (+- EP)	simple	intertidal rock	Intertidal visual censuses (e.g., transects and quadrats)	1	1	1
71	Environmental	Restore and conserve marine communities' size structure	Average size	fish and invertebrates	commercial species	Average Size of Commercial Fish and Invertebrates	X cm (+- EP)	simple	infralittoral rock/ sand	Analysis of fish auction discharges	0	1	0
72	Environmental	Restore and conserve marine communities' size structure	Average size	seagrass	marine prairies	Average Size of Seagrass Stems (Habitat 1110)	X cm (+- EP)	simple	infralittoral sand	UVC (e.g., transects and quadrats)	1	1	1
73	Environmental	Restore and conserve the health status of marine habitats and communities	Percent Cover (Relative Abundance)	invertebrates and algae	non-indigenous species	Percent Cover of non-indigenous Species (Invertebrates, Algae)	%	simple	intertidal rock	Intertidal visual censuses (e.g., transects and quadrats)	0	1	1
74	Environmental	Restore and conserve the health status of marine habitats and communities	Relative Abundance	fish and invertebrates	non-indigenous species	Percentage of non-indigenous Species (Fish, Invertebrates)	%	simple	infralittoral sand	Experimental fishing (beam trawling)	0	1	1
75	Environmental	Restore and conserve the health status of marine habitats and communities	Relative Abundance	fish and invertebrates	non-indigenous species	Percentage of non-indigenous Species (Fish, Invertebrates)	%	simple	infralittoral rock/ sand	Experimental fishing (trammel net, longline, traps)	0	1	1
76	Environmental	Restore and conserve the health status of marine habitats and communities	Relative Abundance	fish and invertebrates	non-indigenous species	Percentage of non-indigenous Species (Fish, Invertebrates)	%	simple	infralittoral rock/ sand	ROV (image analysis)	0	1	1
77	Environmental	Restore and conserve the health status of marine habitats and communities	Distribution	invertebrates and algae	non-indigenous species	Distribution of non-indigenous Species (Invertebrates and Algae)	N/ area unit (m2)	simple	intertidal rock	Intertidal visual censuses (e.g., transects and quadrats)	0	1	1
78	Environmental	Restore and conserve the health status of marine habitats and communities	Distribution	fish and invertebrates	non-indigenous species	Distribution of non-indigenous Species (Fish and Invertebrates)	N/ area unit (m2)	simple	infralittoral sand	Experimental fishing (beam trawling)	0	1	1
79	Environmental	Restore and conserve the health status of marine habitats and communities	Distribution	fish and invertebrates	non-indigenous species	Distribution of non-indigenous Species (Fish and Invertebrates)	N/ area unit (m2)	simple	infralittoral rock/ sand	ROV (image analysis)	0	1	1
80	Environmental	Restore and conserve marine biodiversity and communities' composition	Species Richness/ Diversity	fish and invertebrates	key species (protected, non-indigenous, protected)	Species Richnesss/ Diversity of Fish and Invertebrates (Margalef; Simpson; Shannon; Eveness; Alfa; Beta; Gamma; Pielou Indices)	N/ area unit (m2); N/ volume unit (m3); index	simple/ composite	infralittoral rock/ sand	eDNA	1	1	1
81	Environmental	Restore and conserve the health status of marine habitats and communities	Relative Abundance	corals and sponges	engineering species	Proportion of Corals and Sponges Affected Individuals	N affected Individuals/N total	simple	infralittoral rock	ROV (image analysis)	1	1	1
82	Environmental	Restore and conserve the health status of marine habitats and communities	Relative Abundance	corals and sponges	engineering species	Proportion of Corals and Sponges Affected Individuals	N affected Individuals/N total	simple	infralittoral rock	UVC (e.g., transects and quadrats)	1	1	1
83	Environmental	Restore and conserve the health status of marine habitats and communities	Relative Abundance	seagrass	marine prairies	Percentage of Seagrass Necrotic Leaf Tissue (Habitat 1110)	%	simple	infralittoral sand	UVC (e.g., transects and quadrats)	1	1	1
84	Environmental	Prevent and remove marine litter	Density	marine litter	marine litter	Density of Marine Litter (By Typology)	N/ effort unit	simple	infralittoral rock	ROV (image analysis)	1	1	1
85	Environmental	Prevent and remove marine litter	Density	marine litter	marine litter	Density of Marine Litter (By Typology)	N/ area unit (m2)	simple	infralittoral rock	UVC (e.g., transects and quadrats)	1	1	1
86	Environmental	Prevent and remove marine litter	Density	marine litter	marine litter	Density of Marine Litter (By Typology)	N/ area unit (m2)	simple	intertidal/ coast	Beach visual censuses (OSPAR method)	1	1	1
87	Environmental	Prevent and remove marine litter	Density	marine litter	marine litter	Density of Marine Litter (By Typology)	N/ area unit (m2)	simple	water surface	Visual censuses (boat transects)	1	1	1
88	Environmental	Restore and conserve marine biodiversity and communities' composition	Presence/ Absense	fish and invertebrates	key species (protected, non-indigenous, protected)	Presence/ Absense of Fish and Invertebrates	0/1	simple	infralittoral rock/ sand	eDNA	0	1	1
89	Environmental	Restore and conserve the health status of marine habitats and communities	Index	algae and seagrass	engineering species	Environmental Quality Status (CARLIT, RICQI, CFR Indices or Similar)	index	composite	intertidal rock	Intertidal visual censuses (e.g., transects and quadrats)	0	1	1
90	Environmental	Restore and conserve the health status of marine habitats and communities	Index	algae and seagrass	engineering species	Environmental Quality Status (CARLIT, RICQI, CFR Indices or Similar)	index	composite	infralittoral rock	UVC (e.g., transects and quadrats)	0	1	1
91	Environmental	Restore and conserve the health status of marine habitats and communities	Index	endofauna	key species (protected, trophic groups, functional groups)	Environmental Quality Status (Ambi: ‘Multivariate Azti’S Marine Biotic index’ ; Bo2A: Benthic Opportunistic Annelida Amphipod index)	index	composite	infralittoral sand	Dredges	0	1	1
92	Environmental	Restore and conserve the health status of marine habitats and communities	Index	fish and invertebrates	key species (commercial, non-commercial, trophic groups, functional groups)	Environmental Quality Status (An Adaptation of the EFAI index or Similar)	index	composite	infralittoral sand	Experimental fishing (beam trawling)	0	1	1
93	Environmental	Restore and conserve the health status of marine habitats and communities	Index	fish, invertebrates and algae	key species (protected, commercial, non-commercial, engineering, trophic groups, functional groups)	Environmental Quality Status Indices (An Adaptation of the EFAI Index or Similar)	index	composite	infralittoral rock	UVC (e.g., transects and quadrats)	0	1	1
94	Governance	Effective governance, regulations and enforcement	NA	MPA managers, local community and other MPA users	MPA managers, local community and other MPA users	Perceptions about the Existence of Efficient Surveillance	perceptions	NA	NA	Interviews	0	0	1
95	Governance	Adequate funding and resources for MPA management	NA	MPA managers, guards and staff	MPA managers, guards and staff	Number of Surveillance Exits per Year	N	NA	NA	Surveys	0	0	1
96	Governance	Effective governance, regulations and enforcement	NA	MPA managers, local authorities, local community and other MPA users	MPA managers, local authorities, local community and other MPA users	Perceptions about Surveillance Suitability	perceptions	NA	NA	Interviews	1	0	1
97	Governance	Effective governance, regulations and enforcement	NA	Scientific community and local community	Scientific community studying MPAs and local community	Existence of Adequate Legislation	N	NA	NA	Collection and evaluation of MPA legislation	1	0	1
98	Governance	Effective governance, regulations and enforcement	NA	Scientific community and local community	Scientific community studying MPAs and local community	Perceptions about the Existence of Adequate Legislation	perceptions	NA	NA	Assessment of the Suitability of regulatons throrgh surveys	1	0	1
99	Governance	Effective governance, regulations and enforcement	NA	MPA managers, local community and other MPA users	MPA managers, local community and other MPA users	Perceptions about the Level of Interaction Between MPA Entities in MPA Management	perceptions	NA	NA	Interviews	0	0	1
100	Governance	Local engagement and awareness	NA	Local community and other MPA users	Local community and other MPA users	Perceptions about the Local Knowledge of MPA Rules And Regulations (Including Penalties)	perceptions	NA	NA	Interviews	1	0	0
101	Governance	Local engagement and awareness	NA	MPA managers, local community and other MPA users	MPA managers, local community and other MPA users	Dissemination of Regulations (including Penalties)	N and commuication tool	NA	NA	Surveys	1	0	1
102	Governance	Local engagement and awareness	NA	Local community and other MPA users	Local community and other MPA users	Proportion of Supporters to the Existence of the MPA	proportion	NA	NA	Interviews	0	0	1
103	Governance	Local engagement and awareness	NA	Fishermen, local community and other MPA users	Fishermen, local community and other MPA users	Perceptions about Local Fishermen And Other MPA Stakeholders' Acepptance, Agreement, And Support of MPA Existence	perceptions	NA	NA	Interviews	0	0	1
104	Governance	Local engagement and awareness	NA	Local community	Local community	Perceptions about Local organizations Existence and Activity	perceptions	NA	NA	Interviews	0	0	1
105	Governance	Local engagement and awareness	NA	MPA managers, local community and other MPA users	MPA managers, local community and other MPA users	Perceptions about the Level of Conflict in Marine Resources's Use	perceptions	NA	NA	Interviews	0	0	1
106	Governance	Local engagement and awareness	NA	MPA managers, local community and other MPA users	MPA managers, local community and other MPA users	Perceptions about Stakeholders' Participation And Acceptance of MPA Management Processes And Activities	perceptions	NA	NA	Interviews	0	0	1
107	Governance	Scientific knowledge progress, sharing and application in MPA management	NA	Local community and other MPA users	Local community and other MPA users	Perceptions about the Level of Dissemination of Scientific Knowledge about MPA'S Benefits And Sustainable Use of Marine Resources	perceptions	NA	NA	Interviews	1	0	1
108	Governance	Scientific knowledge progress, sharing and application in MPA management	NA	MPA managers and MPA users	MPA managers and MPA users	Number of Knowledge Dissemination Events	N and commuication tool	NA	NA	Surveys	1	0	1
109	Governance	Scientific knowledge progress, sharing and application in MPA management	NA	MPA managers, local community and other MPA users	MPA managers, local community and other MPA users	Proportion of Stakeholders Aware of the Importance of Marine Resources' Sustainable Use	proportion	NA	NA	Interviews	0	0	1
110	Governance	Scientific knowledge progress, sharing and application in MPA management	NA	Scientific community	Scientific community studying MPAs	Perceptions about the Existence And Application of Scientific Research And Contributions to MPA Management	perceptions	NA	NA	Interviews	0	0	1
111	Governance	Scientific knowledge progress, sharing and application in MPA management	NA	Scientific community	Scientific community studying MPAs	Number of Published Articles/Technical Reports	N	NA	NA	Collection of all scientific information related to the MPA	0	0	1
112	Governance	Adequate funding and resources for MPA management	NA	MPA managers, guards and staff	MPA managers, guards and staff	Percentage of Employees Exclusively Dedicated to the MPA	%	NA	NA	Surveys	0	0	1
113	Governance	Adequate funding and resources for MPA management	NA	MPA managers	MPA managers	Budget For MPA Management (Annual)	m€/ year/ area unit (Km2)	simple	NA	Surveys	0	0	1
114	Governance	Scientific knowledge progress, sharing and application in MPA management	NA	MPA managers	MPA managers	Frequency of Environmental Monitoring Campaigns Carried Out per Year	N/ year/ area unit (Km2)	simple	NA	Surveys	0	0	1
115	Governance	Effective governance, regulations and enforcement	NA	MPA managers, local authorities, guards and staff	MPA managers, local authorities, guards and staff	Number of Fines Per Surveillance Exit Per Year	N/ effort unit / year	simple	NA	Surveys	0	0	1
116	Governance	Adequate funding and resources for MPA management	NA	MPA managers, guards and staff	MPA managers, guards and staff	Number of Available Boats For MPA Management	N	simple	NA	Surveys	0	0	1
117	Governance	Legitimacy of local communities' knowledge and practices	NA	Local community and other MPA users	Local community and other MPA users	Perceptions about Non-Commercial And Non-Use Values	perceptions	NA	NA	Interviews	0	0	0
118	Governance	Legitimacy of local communities' knowledge and practices	NA	Local community and other MPA users	Local community and other MPA users	Perceptions about the Level of Local Ecological Knowledge	perceptions	NA	NA	Interviews	0	0	0
119	Governance	Legitimacy of local communities' knowledge and practices	NA	Local community and other MPA users	Local community and other MPA users	Perceptions about the Local Knowledge of Anthropogenic Impacts On Resources	perceptions	NA	NA	Interviews	0	0	0
120	Governance	Legitimacy of local communities' knowledge and practices	NA	Local community and other MPA users	Local community and other MPA users	Perceptions about the Influence of Local Values And Beliefs On the Acceptance of Management Measures Related to the Use of Marine Resources	perceptions	NA	NA	Interviews	0	0	0
121	Governance	Scientific knowledge progress, sharing and application in MPA management	NA	Local community and other MPA users	Local community and other MPA users	Perceptions about the Benefits of MPA Existence For Stakeholders	perceptions	NA	NA	Interviews	0	1	0
122	Governance	Scientific knowledge progress, sharing and application in MPA management	NA	Local community and other MPA users	Local community and other MPA users	Perceptions about the Level of Scientific Knowledge Acquired By the Local Community	perceptions	NA	NA	Interviews	0	0	0
123	Socioeconomic	Sustainable production and consumption of resources, keeping their impacts within safe ecological limits	NA	Local fishermen	Local fishermen	Perceptions about Local Marine Resources' Exploitation and Trends	perceptions	NA	NA	Interviews	0	1	0
124	Socioeconomic	Sustainable production and consumption of resources, keeping their impacts within safe ecological limits	NA	Local community and other MPA users	Local community and other MPA users	Perceptions about Fish Stocks' Availability (CPUE)	perceptions	NA	NA	Interviews	0	1	0
125	Socioeconomic	Sustainable production and consumption of resources, keeping their impacts within safe ecological limits	LPUE	MPA managers, fishermen and other MPA users	MPA managers, fishermen and other MPA users	LPUE (per species) - Analysis of Fish Auctions Landings/ Fishing Gears Operating inside or Near the MPA	Kg/ effort unit	simple	NA	Analysis of landings	0	1	0
126	Socioeconomic	Sustainable production and consumption of resources, keeping their impacts within safe ecological limits	CPUE	MPA managers, fishermen and other MPA users	MPA managers, fishermen and other MPA users	CPUE - Analysis of Captures - Direct Observations of Fishing Vessels/Gears Operating inside the MPA	Kg/ effort unit	simple	NA	Analysis of captures	0	1	0
127	Socioeconomic	Sustainable production and consumption of resources, keeping their impacts within safe ecological limits	RPUE	MPA managers and MPA users	MPA managers and MPA users	RPUE of Discharges in Fish Auctions Located inside or Near the MPA	m€	simple	NA	Surveys	0	1	0
128	Socioeconomic	Sustainable production and consumption of resources, keeping their impacts within safe ecological limits	NA	MPA managers and MPA users	MPA managers and MPA users	Percentage of income of Each Activity Allowed inside the MPA	%	simple	NA	Surveys	0	1	0
129	Socioeconomic	Sustainable production and consumption of resources, keeping their impacts within safe ecological limits	NA	Local community and other MPA users	Local community and other MPA users	Local Patterns of Marine Resources' Use	proportion	NA	NA	Visual censuses	0	1	0
130	Socioeconomic	Sustainable production and consumption of resources, keeping their impacts within safe ecological limits	NA	MPA managers, local community and other MPA users	MPA managers, local community and other MPA users	Perceptions about Marine Resources' Use Local Patterns	perceptions	NA	NA	Interviews	0	1	0
131	Socioeconomic	Sustainable production and consumption of resources, keeping their impacts within safe ecological limits	Fishing effort	MPA managers, local community and other MPA users	MPA managers, local community and other MPA users	Intensity of Recreational Fishing	fishing effort	NA	NA	Interviews	0	1	0
132	Socioeconomic	Sustainable production and consumption of resources, keeping their impacts within safe ecological limits	NA	MPA managers, local community and other MPA users	MPA managers, local community and other MPA users	Intensity of Recreational And tourist Activities (No Capture or Extraction of Marine Resources)	N (N users per day or effort unit)	NA	NA	Interviews	0	1	0
							1+C118:G119
