# Supplementary material for: Setting Performance Indicators for Coastal Marine Protected Areas: An Expert-Based Methodology
Source: Frontiers journal article supplement (doi:10.3389/fmars.2022.848039), 2022-06-16
Supplement: Table_2.XLSX [file Table_2.XLSX]

## Sheet: Table 1
MONITORING THEME (E - Environmental; S - Socioeconomic; G - Governance)	INDICATOR TYPE	MPA GOALS						INDICATORS	METRICS	OBJECT	OBSERVATIONS	PRIORITY GROUP	INDICATOR ID
		1. MPAs	2. MSFD	3.CBD	4.SDGs	5. OSPAR	3. RN2000 (Directives)
E	State	x	x	x	x	x	x	Habitat distribution and coverage (Habitats Directive, OSPAR List, EUNIS).	Coverage: percent cover (%) or total area (m2) or N (caves); Distribution: 0/ 1 (georreferenced using GNSS RTK, GPS system)	Habitats (Habitats Directive, OSPAR List, EUNIS)		Priority 1	1BE
E	State/Pressure	x	x	x	x	x	x	Habitat vulnerability assessment (climate change and anthropogenic pressures).	indices, expert judgement	Key-habitats	Stratoudakis et al. (2019); Johnson et al. (2016)	Priority 1	2BE
E	State	x	x	x	x	x	x	Diversity of marine birds, mammals, and reptiles (species richness, diversity indices, trophic/functional diversity).	N/ effort unit	Marine birds, mammals, and reptiles		Priority 2	14BE
E	State	x	x	x	x	x	x	Diversity of fish, invertebrates, algae, and seagrass (species richness, diversity indices, trophic/functional diversity).	N/ effort unit or N/ area unit (m2); diversity indices	Fish, invertebrates, algae, and seagrass		Priority 1	3BE
E	State	x	x	x	x	x	x	Abundance of birds, mammals, and marine reptiles in the Birds/Habitats Directive or OSPAR List.	N/ area unit (m2)	Birds, mammals, and marine reptiles		Priority 1	4BE
E	State/Pressure	x	x	x	x			Abundance of commercial fish, invertebrates, and algae (density/frequency of occurrence/coverage).	N/ effort unit or N/ area unit (m2) or Nmax/ frame	Commercial fish, invertebrates, and algae		Priority 1	5BE
E	State	x	x	x	x	x	x	Abundance of fish, invertebrates, algae, and seagrass - communities, key-species, protected, functional/trophic groups (density/frequency of occurrence/coverage).	N/ effort unit or N/ area unit (m2) or Nmax/ frame	Fish, invertebrates, algae, and seagrass (communities, key-species, protected, functional/trophic groups)		Priority 1	6BE
E	Pressure	x	x	x	x	x	x	Relative abundance of non-indigenous species of fish, invertebrates, and algae.	Percentage (%)	Non-indigenous species of fish, invertebrates, and algae		Priority 3	22BE
E	Pressure	x	x	x	x	x	x	Quantification of by-catch or accidental catch of marine birds, mammals, reptiles, fish, and invertebrates.	N/ effort unit	By-catch or accidental catch of marine birds, mammals, reptiles, fish, and invertebrates		Priority 3	23BE
E	State/Pressure	x	x	x	x			Biomass of commercial fish, invertebrates, and algae.	g/ effort unit or g/ area unit (m2)	Commercial fish, invertebrates, and algae		Priority 1	7BE
E	State	x	x	x	x	x	x	Biomass of fish, invertebrates, algae, and seagrass (key-species, protected, functional/trophic groups).	g/ effort unit or g/ area unit (m2)	Fish, invertebrates, algae, and seagrass (key-species, protected, functional/trophic groups)		Priority 1	8BE
E	State	x	x	x	x	x	x	Distribution of marine birds (on the coast), mammals, and reptiles’ populations.	Distribution: 0/ 1 (georreferenced using GNSS RTK, GPS system)	Marine birds (on the coast), mammals, and reptiles		Priority 2	15BE
E	State/Pressure	x	x	x	x			Distribution of commercial fish, and invertebrates.	Distribution: 0/ 1 (georreferenced using GNSS RTK, GPS system)	Commercial fish, and invertebrates		Priority 2	16BE
E	State	x	x	x	x	x	x	Distribution of key and protected species of fish, invertebrates, algae, and seagrass.	Distribution: 0/ 1 (georreferenced using GNSS RTK, GPS system)	Fish, invertebrates, algae, and seagrass (key-species, protected)		Priority 2	17BE
E	Pressure	x	x	x	x	x	x	Distribution of non-indigenous species of fish, invertebrates, and algae.	Distribution: 0/ 1 (georreferenced using GNSS RTK, GPS system)	Non-indigenous species of fish, invertebrates, and algae		Priority 2	18BE
E	State/Pressure	x	x	x	x	x	x	Early detection of non-indigenous species.	Occurrence of non-indigenous species in port areas (0/ 1)	Non-indigenous species of fish, invertebrates, and algae	Through the recognition of the life cycle of non-indigenous species.	Priority 1	9BE
E	State/Pressure	x	x	x	x			Average size of commercial fish, invertebrates, and algae.	Average size (cm)	Commercial fish, invertebrates, and algae		Priority 1	10BE
E	State	x	x	x	x	x	x	Average size of fish, invertebrates (including corals and sponges), algae, and seagrass (key-species, protected, functional/trophic groups).	Average size (cm)	Fish, invertebrates (including corals and sponges), algae, and seagrass (key-species, protected, functional/trophic groups)		Priority 1	11BE
E	State/Pressure	x	x	x	x	x	x	Health and conservation status of engineering species (biotic habitat).	Proportion: N damaged individuals (necrosis, mortality, physical damage) / total N	Corals, sponges, seagrass and other engineering species		Priority 2	19BE
E	Pressure	x	x	x	x	x		Density of marine litter (by type).	N/ effort unit or N/ area unit (m2)	Marine litter		Priority 3	24BE
E	Pressure	x	x	x	x	x		Chemical pollution assessment.	ppt (parts per thousand)	Oils, heavy metals and organic compounds		Priority 1	12BE
E	State	x	x	x	x	x		Changes in environmental quality indices (CARLIT, RICQI, CFR, or similar).	Index	Engineering species		Priority 2	20BE
E	State	x	x	x	x	x		Environmental quality status assessment (DEVOTES NEAT: Nested Environmental Status Assessment Tool).	Index (0-1)	Pelagic and benthic organisms		Priority 2	21BE
E	State	x	x	x	x	x	x	Biological connectivity patterns of key-species (genetics, modelling and telemetry).	Genetics, modelling and telemetry (metrics to be defined)	Key-species populations	Biophysical modeling of larval dispersal: oceanographic conditions + calculation of pelagic larval duration (PLD) and dispersal distance. In the future, establish reference values for the dispersion distance. Analysis of the genetic structure and chemical composition of otoliths. Telemetry.	Priority 1	13BE
G	Response	x	x	x	x	x	x	Performance of MPA management plans’ implementation (including monitoring and enforcement plans).	Existence of management plans (Yes/ No)	MPA management authority and regional departments		Priority 2	6GS
									Proportion: Number of executed measures and actions / number of proposed actions and measures
G	Response	x	x	x	x	x	x	Existence of an efficient, comprehensive, and adequate surveillance of the MPA.	Questionnaire (Yes/ No): Does the monitoring plan exist? Is it fulfilled? Is it adequate?	MPA management authority, other competent authorities, MPA guards/staff		Priority 1	1GS
									Location - geographical coordinates of the vertices (using GNSS RTK, GPS system); and extension of the surveillance area (Km2)
									Number of surveillance exits per year; or number of fines per surveillance exit per year
									Perceptions about the existence of efficient, comprehensive and adequate surveillance	MPA guards/staff, local community and other MPA users
G	Response	x	x	x	x	x	x	Existence of adequate legislation for the MPA’s management and its objectives.	Perceptions about the existence of adequate legislation: - Are there gaps in MPA legislation? What are they? - What laws/management measures do you agree or disagree with? - Do you accept and support the imposed regulations? - Verification of the proportion between supporters and non-supporters in each stage of the MPA implementation.	Scientific community, MPA management authority, authorities responsible for licensing and inspection of economic activities, national nature conservation authority, fishermen, local community and other MPA users		Priority 1	2GS
									Consultation of a complete existig legislation compendium to verify the existence of contrasts with perceptions: 1) existence of regulation; 2) legislation adequacy (related to the MPA objectives)	Existing legislation
G	Response	x	x	x	x	x	x	Articulation of responsibilities, actions, and transparency between MPA competent entities.	Existence (0/ 1) of legal instruments that clarify the role of managing entities (degree of clarity of the role of each managing entity)	MPA management authorities and other entities with competencies in MPAs, e.g., maritime authorities, local community, and the scientific community.	This indicator is also intended to assess the effectiveness of the coordinating committees/ groups for MPA management already assigned by law.	Priority 2	7GS
									Existence of transparency and shared actions through: 1) clear identification of all MPA competent entities (socioeconomic agents, participation and involvement mechanisms); 2) existence of protocols between key-entities; 3) existence of shared actions (e.g., forums, strategic councils, concerted laws).
									Perceptions on the level of competencies sharing and transparency between managers.
G	Response	x	x	x	x	x		Communication efficiency (MPA’s rules and regulations).	Number of information platforms (material or digital,e.g., information boards and panels, interpretative centers, websites)	MPA management authority		Priority 2	8GS
									Number of information dissemination events per year
									Number of participants in information dissemination events per year
									Number of offenses detected per unit of surveillance effort
									Assessment (through questionnaires) of the level of knowledge about MPA regulations and how this knowledge is disseminated	MPA management authority, local community, MPA visitors and other MPA users
G	Response	x	x	x	x	x		Communication efficiency (MPA’s scientific support, reserve effects, and sustainable use).	Number of dissemination events per year	MPA management authority and MPA users		Priority 2	9GS
									Number of participants in dissemination events per year
									Number of information platforms (material or digital,e.g., information boards and panels, interpretative centers, websites)
									Perceptions into previous metrics for comparison	MPA management authority, local community, operators and fishermen and other MPA users
									Proportion of people aware of sustainable use (with economic benefits)
G	Response	x	x	x	x	x		Conflict level in the MPA.	Perceptions about the conflict level in the use of marine resources	MPA management authority, local community, fishermen and other MPA users		Priority 2	10GS
									Number and typology of complaints and number of reports (to counteract perceptions)
G	Response	x	x	x	x	x	x	Production of scientific knowledge that meets the needs detected by management.	Number of published articles and technical reports that answer to MPAs management questions	MPA management authority and scientific community		Priority 2	11GS
									Number of studies requested for MPAs management
									Percentage of revisions to MPA legislation and management measures that follow scientific advice
G	Response	x	x	x	x	x	x	Material and human resources capacity allocated to MPA’s management.	Number of MPA employees per month per area unit (Km2); and number of work hours	MPA management authority, MPA guards/staff, maritime authorities		Priority 1	3GS
									Proportion between the number of employees exclusively dedicated to the MPA and the total number of employees
									Investment budget (m€) for MPA management per year per area unit (Km2)
									Percentage (%) of the natural park's budget dedicated to MPA management
									Number of boats/vessels available for MPA management per area unit (Km2)
									Perceptions of the adequacy of 1) human resources, 2) budget allocated to management (classification using the 5-point likert scale, from 1- inadequate to 5 - very adequate)
G	Response	x	x	x	x	x	x	Existence and thematic scope of monitoring campaigns for MPA’s biological communities and habitats.	Number of projects per year and number of monitoring topics covered per year (e.g., marine litter, protection effect, invasive species)	MPA management authority, maritime authorities and scientific community		Priority 2	12GS
G	Response	x	x	x	x	x		Integration of the local communities’ knowledge and practices relevant to the conservation and sustainable use of biodiversity.	Perceptions about the influence of local values and traditions in the design of management plans and measures for the acceptance of these by the local community: 1) questions addressed to the MPA management authority about the integrations of knowledge and local practices in the design of management plans and acceptance measures; 2) rating processes for MPA users and the local community to classi…	MPA management authority, local community and other MPA users		Priority 2	13GS
S	Pressure/Response	x	x	x	x			Socioeconomic benefits and harms of MPAs for the fisheries sector.	LPUE (N or Kg per effort unit per species) of landings in fish auctions (boats/vessels operating inside the MPA or close to it)	Commercial fishing	One should determine the carrying capacity of the activities with the greatest impact.	Priority 1	4GS
									CPUE (N or Kg per effort unit per species) by direct observations on fishing vessels/ of gears operating inside the MPA
									Commercial fishing effort per métier (number of vessels operating inside or close to the MPA; number of days operating; average number of caught (with and without rejection) and sold individuals and their respective biomass
									Commercial fish total catch (with and without rejection) - CPUE * fishing effort.
									Commercial fishing income (m€ per effort unit) from landings in fish auctions located inside MPAs or close to it
									CPUE (N or Kg per effort unit per species) by direct observations on fishing vessels/ of gears operating inside the MPA	Recreational fishing
									Recreational fishing effort (number of fishermen with and without license; number of hours fishing; number of days fishing)
									Recreational fishing total catch (with and without rejection) - CPUE * fishing effort.
									Recreational fishing income (m€ per exit) of maritime and tourist activities that operate inside the MPA
S	Pressure/Response	x	x	x	x			Socioeconomic benefits and harms of MPAs for maritime and touristic activities (without resources extraction).	Income of maritime and touristic activities (without resources' extraction) operating inside the MPA (m€ per exit per activity typology)	Maritime and tourist activities (without marine resources' capture or extraction)	One should determine the carrying capacity of the activities with the greatest impact.	Priority 1	5GS
									Intensity of use by the maritime and tourist activities: number of users per area unit (Km2) per activity typology (mapping)
