# Supplementary material for: Setting Performance Indicators for Coastal Marine Protected Areas: An Expert-Based Methodology
Source: Frontiers journal article supplement (doi:10.3389/fmars.2022.848039), 2022-06-16
Supplement: Table_3.XLSX [file Table_3.XLSX]

## Sheet: Table 1
Monitoring theme (BE- Biological/ Ecological; GS - Governance and Socioeconomic)	PRIORITIZED INDICATORS	SURVEY METHODS
				* non-consensual methods
BE	Habitat distribution and coverage (Habitats Directive, OSPAR List, EUNIS). Object: Habitats (Habitats Directive, OSPAR List, EUNIS) Metrics:Coverage: percent cover (%) or total area (m2) or N (caves); Distribution: 0/ 1 (georreferenced using GNSS RTK, GPS system)	Multibeam/sonar scanning
		LiDAR
		Visual censuses (boat transect and diving) - distribution of caves
		Remote sensing (orthophotos - intertidal areas)
		ROV (image analysis)
		AUVs
		Drop cameras (DOV)
		Underwater visual censuses (UVC, e.g., transects and quadrats)
BE	Habitat vulnerability assessment (climate change and anthropogenic pressures). Object: Key-habitats Metrics: Indices, expert judgement	Data analysis
		Expert judgement
BE	Diversity of marine birds, mammals, and reptiles (species richness, diversity indices, trophic/functional diversity). Object: Marine birds, mammals, and reptiles Metrics: N/ effort unit	Visual censuses (from the coast, boat transects, distance sampling and photo-identification)
		By-catch analysis
		Onboard observations
		Citizen science
BE	Diversity of fish, invertebrates, algae, and seagrass (species richness, diversity indices, trophic/functional diversity). Object: Fish, invertebrates, algae, and seagrass Metrics: N/ effort unit or N/ area unit (m2); diversity indices	Baited cameras (BRUVs)
		Underwater visual censuses (UVC, e.g., transects and quadrats)
		Intertidal visual censuses (e.g., transects and quadrats)
		Dredges
		Experimental fishing (beam or otter trawling)
		Experimental fishing (trammel net, longline, traps)
		ROV (image analysis)
		eDNA (environmental DNA)
		Scraping
		Light traps
		Drop cameras (DOV)
BE	Abundance of birds, mammals, and marine reptiles in the Birds/Habitats Directive or OSPAR List. Object: Birds, mammals, and marine reptiles Metrics: N/ area unit (m2)	Visual censuses (from the coast, boat transects, distance sampling and photo-identification)
		Onboard observations
		Citizen science
BE	Abundance of commercial fish, invertebrates, and algae (density/frequency of occurrence/coverage). Object: Commercial fish, invertebrates, and algae Metrics: N/ effort unit or N/ area unit (m2) or Nmax/ frame	Experimental fishing (beam or otter trawling)
		Experimental fishing (trammel net, longline, traps)
		Baited cameras (BRUVs)
		Underwater visual censuses (UVC, e.g., transects and quadrats)
		Intertidal visual censuses (e.g., transects and quadrats)
		Scraping
		ROV (image analysis)
		AUVs
		Analysis of fish auction discharges
		Experimental fishing (pelagic trawling)
		Experimental fishing (by line)
		Drop cameras (DOV)
		Dredges
		Acoustic sampling with multibeam/sonar scanning (pelagic species)
BE	Abundance of fish, invertebrates, algae, and seagrass - communities, key-species, protected, functional/trophic groups (density/frequency of occurrence/coverage). Object: Fish, invertebrates, algae, and seagrass (communities, key-species, protected, functional/trophic groups) Metrics: N/ effort unit or N/ area unit (m2) or Nmax/ frame	Underwater visual censuses (UVC, e.g., transects and quadrats)
		Intertidal visual censuses (e.g., transects and quadrats)
		ROV (image analysis)
		Baited cameras (BRUVs)
		Experimental fishing (beam or otter trawling)
		Experimental fishing (trammel net, longline, traps)
		Dredges
		Scraping
		AUVs
		Drop cameras (DOV)
BE	Relative abundance of non-indigenous species of fish, invertebrates, and algae. Object: Non-indigenous species of fish, invertebrates, and algae Metrics: Percentage (%)	Underwater visual censuses (UVC, e.g., transects and quadrats)
		Intertidal visual censuses (e.g., transects and quadrats)
		Scraping
		Baited cameras (BRUVs)
		Artificial colonizing plaques
		ROV (image analysis)
		Experimental fishing (beam or otter trawling)
		Experimental fishing (trammel net, longline, traps)
BE	Quantification of by-catch or accidental catch of marine birds, mammals, reptiles, fish, and invertebrates. Object: By-catch or accidental catch of marine birds, mammals, reptiles, fish, and invertebrates Metrics: N/ effort unit	By-catch analysis
		Onboard observations
		Surveys
		Citizen science
BE	Biomass of commercial fish, invertebrates, and algae. Object: Commercial fish, invertebrates, and algae Metrics: g/ effort unit or g/ area unit (m2)	Experimental fishing (beam or otter trawling)
		Experimental fishing (trammel net, longline, traps)
		Baited cameras (BRUVs)
		Underwater visual censuses (UVC, e.g., transects and quadrats)
		Intertidal visual censuses (e.g., transects and quadrats)
		Scraping
		Analysis of fish auction discharges
		ROV (image analysis)
		AUVs
		Drop cameras (DOV)
		Experimental fishing (pelagic trawling)
BE	Biomass of fish, invertebrates, algae, and seagrass (key-species, protected, functional/trophic groups). Object: Fish, invertebrates, algae, and seagrass (key-species, protected, functional/trophic groups) Metrics: g/ effort unit or g/ area unit (m2)	Baited cameras (BRUVs)
		Underwater visual censuses (UVC, e.g., transects and quadrats)
		Intertidal visual censuses (e.g., transects and quadrats)
		Experimental fishing (trammel net, longline, traps)
		Experimental fishing (beam or otter trawling)
		Scraping
		AUVs
		Drop cameras (DOV)
		ROV (image analysis)
		Dredges
BE	Distribution of marine birds (on the coast), mammals, and reptiles’ populations. Object: Marine birds (on the coast), mammals, and reptiles Metrics: Distribution: 0/ 1 (georreferenced using GNSS RTK, GPS system)	Visual censuses (from the coast, boat transects, distance sampling and photo-identification)
		Onboard observations
		Citizen science
BE	Distribution of commercial fish, and invertebrates. Object: Commercial fish, and invertebrates Metrics: Distribution: 0/ 1 (georreferenced using GNSS RTK, GPS system)	Underwater visual censuses (UVC, e.g., transects and quadrats)
		Baited cameras (BRUVs)
		Acoustic telemetry
		Acoustic sampling with multibeam/sonar scanning (pelagic species)
		Capture-recapture w/ conventional tagging
		Experimental fishing
BE	Distribution of key and protected species of fish, invertebrates, algae, and seagrass. Object: Fish, invertebrates, algae, and seagrass (key-species, protected) Metrics: Distribution: 0/ 1 (georreferenced using GNSS RTK, GPS system)	Underwater visual censuses (UVC, e.g., transects and quadrats)
		Intertidal visual censuses (e.g., transects and quadrats)
		ROV (image analysis)
		Acoustic telemetry
		Experimental fishing (beam or otter trawling)
		Scraping
		Capture-recapture w/ conventional tagging
		Baited cameras (BRUVs)
BE	Distribution of non-indigenous species of fish, invertebrates, and algae. Object: Non-indigenous species of fish, invertebrates, and algae Metrics: Distribution: 0/ 1 (georreferenced using GNSS RTK, GPS system)	Underwater visual censuses (UVC, e.g., transects and quadrats)
		Intertidal visual censuses (e.g., transects and quadrats)
		ROV (image analysis)
		Scraping
		Baited cameras (BRUVs)
		Experimental fishing (beam or otter trawling)
		Artificial colonizing plaques
		Citizen science
BE	Early detection of non-indigenous species. Object: Non-indigenous species of fish, invertebrates, and algae Metrics: Occurrence of non-indigenous species in port areas (0/ 1)	Artificial colonizing plaques
		Citizen science
		RAS ("Rapid Assessment System")
BE	Average size of commercial fish, invertebrates, and algae. Object: Commercial fish, invertebrates, and algae Metrics: Average size (cm)	Experimental fishing (trammel net, longline, traps)
		Experimental fishing (beam or otter trawling)
		Underwater visual censuses (UVC, e.g., transects and quadrats)
		Baited cameras (BRUVs)
		Analysis of fish auction discharges
		ROV (image analysis)
		Experimental fishing (pelagic trawling)
		Intertidal visual censuses (e.g., transects and quadrats)
BE	Average size of fish, invertebrates (including corals and sponges), algae, and seagrass (key-species, protected, functional/trophic groups). Object: Fish, invertebrates (including corals and sponges), algae, and seagrass (key-species, protected, functional/trophic groups) Metrics: Average size (cm)	Baited cameras (BRUVs)
		Underwater visual censuses (UVC, e.g., transects and quadrats)
		Intertidal visual censuses (e.g., transects and quadrats)
		ROV (image analysis)
		Experimental fishing (trammel net, longline, traps)
		Experimental fishing (beam or otter trawling)
BE	Health and conservation status of engineering species (biotic habitat). Object: Corals, sponges, seagrass and other engineering species Metrics: Proportion: N damaged individuals (necrosis, mortality, physical damage) / total N	Underwater visual censuses (UVC, e.g., transects and quadrats)
		ROV (image analysis)
		AUVs
		Drop cameras (DOV)
BE	Density of marine litter (by type). Object: Marine litter Metrics: N/ effort unit or N/ area unit (m2)	Visual censuses (boat transect)
		ROV (image analysis)
		Underwater visual censuses (UVC, e.g., transects and quadrats)
		Beach visual censuses (OSPAR method)
		Plankton hauls
		Citizen science
BE	Chemical pollution assessment. Object: Oils, heavy metals and organic compounds Metrics: PPT (parts per thousand)	Water and sediment sample analysis
		Physico-chemical characterization of water (probes and fixed multi-parameter analysis stations)
		Ecotoxicology of indicator species (biomarkers)
BE	Changes in environmental quality indices (CARLIT, RICQI, CFR, or similar). Object: Engineering species Metrics: Index	Underwater visual censuses (UVC, e.g., transects and quadrats)
		Intertidal visual censuses (e.g., transects and quadrats)
		ROV (image analysis)
BE	Environmental quality status assessment (DEVOTES NEAT: Nested Environmental Status Assessment Tool). Object: Pelagic and benthic organisms Metrics: Index (0-1)	N/A
BE	Biological connectivity patterns of key-species (genetics, modelling and telemetry). Object: Key-species populations Metrics: Genetics, modelling and telemetry (metrics to be defined)	Light traps
		Capture-recapture w/ conventional tagging
		Acoustic telemetry
		Plankton hauls
		Natural/microchemical markers (otoliths, genetics, etc.)
GS	Performance of MPA management plans’ implementation (including monitoring and enforcement plans). Object: MPA management authority and regional departments Metrics: Existence of an execution program (Yes/ No); Proportion: Number of executed measures and actions / number of proposed actions and measures.	Surveys
		Consultation of relevant documentation
GS	Existence of an efficient, comprehensive, and adequate surveillance of the MPA. Object: (1) MPA management authority, other competent authorities, MPA guards/staff; (2) MPA guards/staff, local community and other MPA users. Metrics: (1.1) Questionnaire (Yes/ No): Does the monitoring plan exist? Is it fulfilled? Is it adequate?; (1.2) Location - geographical coordinates of the vertices (using GNSS…	Surveys
		Consultation of relevant documentation
		Interviews
GS	Existence of adequate legislation for the MPA’s management and its objectives. Object: (1) Scientific community, MPA management authority, authorities responsible for licensing and inspection of economic activities, national nature conservation authority, fishermen, local community and other MPA users; (2) Existing legislation. Metrics: (1) Perceptions about the existence of adequate legislation:…	Interviews
		Consultation of relevant documentation
GS	Articulation of responsibilities, actions, and transparency between MPA competent entities. Object: MPA management authorities and other entities with competencies in MPAs, e.g., maritime authorities, local community, and the scientific community. Metrics: Existence (0/ 1) of legal instruments that clarify the role of managing entities (degree of clarity of the role of each managing entity); Exis…	Consultation of relevant documentation
		Interviews
GS	Communication efficiency (MPA’s rules and regulations). Object: (1) MPA management authority; (2) MPA management authority, local community, MPA visitors and other MPA users. Metrics: (1.1) Number of information platforms (material or digital,e.g., information boards and panels, interpretative centers, websites); (1.2) Number of information dissemination actions per year; (1.3) Number of particip…	Surveys
GS	Communication efficiency (MPA’s scientific support, reserve effects, and sustainable use). Object: (1) MPA management authority and MPA users; (2) MPA management authority, local community, operators and fishermen and other MPA users. Metrics: (1.1) Number of dissemination events per year; (1.2) Number of participants in dissemination events per year; (1.3) Number of information platforms (materi…	Surveys
		Interviews
GS	Conflict level in the MPA. Object: MPA management authority, local community, fishermen and other MPA users Metrics: Perceptions about the conflict level in the use of marine resources; Number and typology of complaints and number of reports (to counteract perceptions).	Surveys
		Interviews
GS	Production of scientific knowledge that meets the needs detected by management. Object: MPA management authority and scientific community Metrics: Number of published articles and technical reports that answer to MPAs management questions; Number of studies requested for MPAs management; Percentage of revisions to MPA legislation and management measures that follow scientific advice.	Consultation of relevant documentation
GS	Material and human resources capacity allocated to MPA’s management. Object: MPA management authority, MPA guards/staff, maritime authorities Metrics: Number of MPA employees per month per area unit (Km2); and number of work hours; Proportion between the number of employees exclusively dedicated to the MPA and the total number of employees; Investment budget (m€) for MPA management per year per a…	Surveys
		Interviews
GS	Existence and thematic scope of monitoring campaigns for MPA’s biological communities and habitats. Object: MPA management authority, maritime authorities and scientific community Metrics: Number of projects per year and number of monitoring topics covered per year (e.g., marine litter, protection effect, invasive species).	Surveys
		Consultation of relevant documentation
GS	Integration of the local communities’ knowledge and practices relevant to the conservation and sustainable use of biodiversity. Object: MPA management authority, local community and other MPA users Metrics: Perceptions about the influence of local values and traditions in the design of management plans and measures for the acceptance of these by the local community: a) questions addressed to the …	Surveys
GS	Socioeconomic benefits and harms of MPAs for the fisheries sector. Object: (1) Commercial fishing; (2) Recreational fishing. Metrics: (1.1) CPUE (N or Kg per effort unit per species) of landings in fish auctions (boats/vessels operating inside the MPA or close to it); (1.2) CPUE (N or Kg per effort unit per species) by direct observations on fishing vessels/ of gears operating inside the MPA; (1.…	Analysis of fish auction discharges
		Visual censuses and direct observations
		AIS + UMS + statistical data
		Surveys
		Data analysis
		Analysis of fish sales in the tertiary sector, seafood price differences at fish auctions
		Consultation and analysis of official statistics
		Surveys
GS	Socioeconomic benefits and harms of MPAs for the maritime and touristic activities (without resources extraction). Object: Maritime and tourist activities (without marine resources' capture or extraction) Metrics: Income of maritime and touristic activities (without resources' extraction) operating inside the MPA (m€ per exit per activity typology); Intensity of use by the maritime and tourist ac…	Surveys
		Visual censuses and direct observations
		Interviews
