# Supplementary material for: Setting Performance Indicators for Coastal Marine Protected Areas: An Expert-Based Methodology
Source: Frontiers journal article supplement (doi:10.3389/fmars.2022.848039), 2022-06-16
Supplement: Table_4.XLS [file Table_4.XLS]

## Sheet: Folha1
	OBJECTIVES OF PORTUGUESE MARINE PROTECTED AREAS
	- Legal Regime for Nature and Biodiversity Conservation in accordance with the Decree-Law No. 142/2008, pp. 1-26, Series I of 2008-07-24. Portuguese Ministry of the Environment, Land Use Planning and Regional Development, Lisbon.
	- Objectives of the Marine Park of Litoral Norte Natural Park (PNLN) in accordance with the Resolution of the Council of Ministers No. 175/2008, pp. 4857-4874. Official Gazette No. 228/2008, Series I of 2008-11-24. Presidency of the Council of Ministers, Lisbon.
	- Objectives of the Prof. Luiz Saldanha Marine Park of Arrábida Natural Park (PNA) in accordance with: a) Regulatory Decree No. 23/98, pp. 5339-5345. Official Gazette No. 237/1998, Series I-B of 1998-10-14. Ministry of Environment, Lisbon.; b) Resolution of the Council of Ministers No. 141/2005, pp. 4857-4874. Official Gazette No. 161/2005, Series I-B of 2005-08-23. Presidency of the Council of M…
	- Objectives of the Marine Park of Sudoeste Alentejano and Costa Vicentina Natural Park (PNSACV) in accordance with the Resolution of the Council of Ministers n.º 11-B/2011, pp. 682-(31) to 682-(67). Official Gazette No. 25/2011, 1st Supplement, Series I of 2011-02-04. Presidency of the Council of Ministers, Lisbon.
	*The MPA objectives are those that are clearly identified for the marine area of the Natural Parks. The objectives were identified in the General Provisions and in the Common Provisions as general and specific objectives of the Natural Parks and their protection zones. The objectives of specific intervention areas were not considered. MPA goals were defined based on the objectives retrieved from …
	Prioritized Indicators Priority 1, 2 and 3 (P1, P2, P3, respectively)	National MPA Objectives (PNA, PNLN, PNSACV)
	Goal 1: Conserve and recover marine biodiversity (monitoring of species and habitats)
	P1 (1E-12E), P2 (14E-21E), P3 (22E-24E)	Safeguard natural values and resources to gurantee the maintenance and promotion of natural and semi-natural landscape characteristics and biodiversity.
	P1 (1E-4E, 6E, 8E, 9E, 11E, 12E), P2 (14E, 15E, 17E-21E), P3 (22E-23E)	Correspond to the conservation imperatives of protected natural habitats and wild flora and fauna, according to the EU Birds (Council Directive 79/409/EEC) and Habitat Directives (Council Directive 92/43/EEC).
	P1 (1E, 3E), P2 (14E-18E, 21E)	Conserve marine biodiversity.
	P1 (1E, 3E-11E), P2(14E-21E), P3 (22E)	Constitute a marine biodiversity reserve.
	P1 (3E-11E), P2 (14E, 18E-21E)	Maintain natural values and processes in a tendentially undisturbed state.
	P1 (1E, 3E, 4E, 6E, 8E, 9E, P2 (14E, 15E, 17E, 18E, 20E, 21E)	Conserve, recover and promote biological, geological, landscape, and cultural values relevant to biodiversity conservation.
	P1 (1E, 2E), P2 (19E)	Recover habitats, namely the marine phanerogam meadows.
	P1 (1E-4E, 6E, 8E, 11E), P2 (14E, 15E, 17E, 19E, 21E)	Conserve the most relevant natural habitats, flora, and fauna, especially those of community interest listed in specific legislation, including communities of nesting, wintering and migrating marine birds, and other endemic or threatened species.
	P1 (3E-8E, 10E, 11E), P2 (14E, 19E-21E)	Preserve ecological representative examples in a dynamic and evolving state.
	P1 (2E, 9E, 12E), P2 (18E), P3 (22E, 23E, 24E)	Correct or underpin the processes that lead to the degradation of the natural values by creating conditions for their maintenance and promotion.
	P1 (2E, 9E, 12E), P2 (18E), P3 (22E-24E)	Prevent risky situations, accidents and catastrophes.
	Goal 2: Sustainable fisheries
	P1 (5E, 7E, 10E, 4GS), P2 (16E)	Sustainable exploitation of fishery resources, compatible with biodiversity conservation, and seafood certification.
	P1 (5E, 7E, 10E, 4GS), P2 (16E)	Recover or maintain populations of commercially exploited species
	Goal 3: Sustainable management and use of marine resources
	P1 (4GS, 5GS), P2 (11GS-13GS)	Manage rationally and conserve natural, landscape, and cultural values, including regional flora, fauna, landscape, geological and geomorphological values.
	P1 (4GS, 5GS)	Promote sustainable management and use of marine resources, enabling the maintenance of essential ecological systems and life supports, the preservation of biodiversity, and the recovery of depleted or overexploited resources.
	P1 (4GS, 5GS), P2 (13GS)	Make human activity compatible with the conservation of natural and landscape values.
	P2 (7GS, 13GS)	Recover, protect, enhance, and promote relevant cultural heritage (and archaeological), and use it sustainably in coordination with the entities with competence in the matter.
	Goal 4: Sustainable development
	P1 (4GS, 5GS)	Conserve natural values contributing to regional and national sustainable development.
	P1 (2GS, 4GS, 5GS), P2 (6GS, 10GS, 11GS, 13GS)	Fix the uses and their management plan to guarantee: biodiversity conservation; the natural balance of ecosystems; the maintenance and promotion of natural and semi-natural landscapes and the social, economic and cultural values of the protected area; local populations well-being; and the region's sustainable development.
	P1 (2GS, 4GS, 5GS), P2 (6GS, 10GS, 11GS, 13GS)	Integrate human activities wisely through the rational management of natural resources, and the territorial planning of extractive and non-extractive uses; thereby promoting the sustainable development of social and economic systems, thus the well-being of local populations.
	-	Promote activities that constitute alternative paths for local sustainable development.
	P1 (2GS, 4GS, 5GS), P2 (13GS)	Implement management measures that promote the sustainable use of resources ensuring local socioeconomic development.
	P1 (2GS, 4GS, 5GS), P2 (6GS, 10GS, 11GS, 13GS)	Develop ecosystem-based integrated management measures that contribute to the local socioeconomic development.
	P2 (13GS)	Sustainable development through the promotion of regionally based traditional economic activities such as traditional fishing with selective gears (e.g., lines and hooks), compatible with the conservation of biological, geological, and landscape values.
	P1 (5GS), P2 (9GS, 13GS)	Promote nature tourism from the perspective of valuing and conserving resources and sustainable development.
	-	Protect, safeguard, and promote underwater cultural landscapes and traditional or historical heritage as an element of regional development.
	Goal 5: Prevent marine pollution
	P1 (12E), P3 (24E)	Adaptation of general effluent emission standards to its environment's capacity.
	P1 (2E, 12E), P2 (20E), P3 (24E)	Guarantee the assessment of the cumulative environmental impacts of existing industrial activities.
	Goal 6: Promote, develop, and apply scientific research
	P2 (11GS)	Scientific research applied to nature conservation and to the management of marine living resources.
	P2 (11GS, 12GS)	Promote scientific research and the knowledge of the ecosystems (habitats, species, and natural and socioeconomic processes), and their monitoring, thus contributing to adaptive management strongly based on technical and scientific knowledge.
	Goal 7: Community awareness and participation
	P2 (8GS, 9GS, 13GS)	Guarantee civil society's awareness, training, and participation for the conservation of natural values and sustainable development.
	Goal 8: Cooperation and participation of stakeholders
	P2 (7GS, 13GS)	Active participation of all stakeholders (public and private entities) in MPA management and in regional sustainable development, in collaboration with local populations and visitors.
	Goal 9: Provide MPA management plans, enforcement, and foster compliance
	P1 (1GS, 3GS)	Surveillance and enforcement.
	P1 (2GS)	Create transition or impact dampening areas, necessary for the protection of areas with superior protection regimes.
	P1 (1GS, 3GS), P2 (6GS-9GS, 12GS, 13GS)	Promote management practices that guarantee the conservation of the biodiversity elements.
	P1 (2GS, 4GS, 5GS), P2 (6GS)	Define models and rules of territory planning for different uses, and extractive and non-extractive activities (e.g., fishing, industrial, recreational, tourist activities), in order to minimize their impact on marine biodiversity and quality of natural, semi-natural, landscape, aesthetic, and cultural values of the region and to promote sustainable development.
	P1 (2GS), P2 (6GS, 11GS, 13GS)	Based on existing values, determine the appropriate protection regimes, and respective zones, and set priorities for intervention.
	Goal 10: Knowledge dissemination for awareness
	P2 (8GS, 9GS, 13GS)	Environmental information, awareness and education.
	P2 (8GS, 9GS)	Promote environmental education and knowledge dissemination of natural and socio-cultural values, to raise awareness of protection needs, especially among economic and social agents and local populations.
	P2 (9GS)	Promote recreational and leisure activities (including visitation), compatible with the maintenance of local values, for local environmental knowledge and awareness.
	Goal 11: Implementation of a MPA network
	P1 (1E, 2E, 13E), P2 (15E-17E, 21E)	Contribute to the implementation of a network of marine protected areas.
